# Supplementary material
Source: PubMed Central journal article supplement (PMC4259275)
Supplement: supp_bht204_bht204supp_fig.pdf [file supp_bht204_bht204supp_fig.pdf]

**Supplementary Figure 1a**

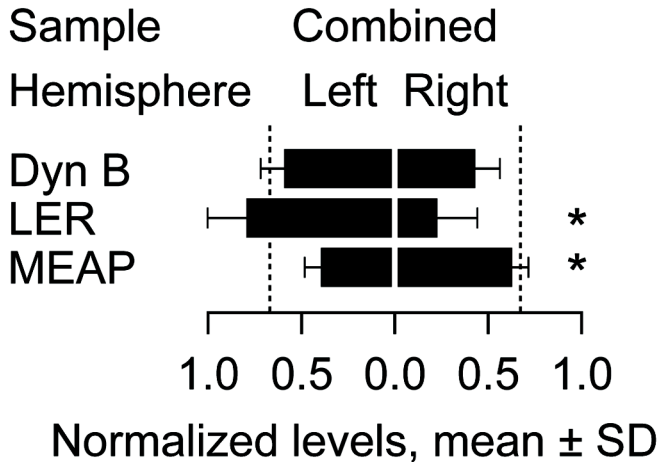

Comparison of the opioid peptide levels between the left and the right pgACC in the replication sample ( $N=12$  including 9 male and 3 female subjects). Data are shown as mean ± SD of the normalized levels in the LH [ $L/(L+R)$ ] and RH [ $R/(L+R)$ ], where L and R is level in the LH and RH, respectively. Dashed lines at a 0.66 value mark 2-fold differences between the hemispheres. Significance levels in ANOVAs: lateralization effects,  $*p \leq 0.05$ .

**Supplementary Figure 1b**

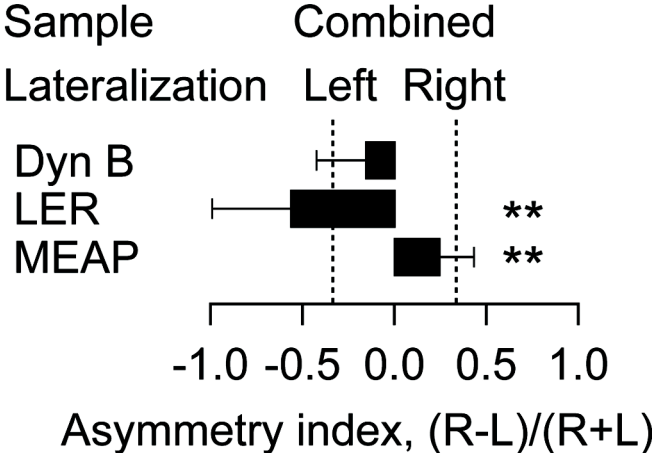

The asymmetry index (AI) of the opioid peptides in the pgACC. The AI  $[(R-L)/(R+L)]$  is a measure of hemispheric differences which the -1.0 and +1.0 values indicate a complete left or right lateralization, respectively, and the 0.0 value symmetric distribution. Data bars represent means  $\pm$  SD. Dashed lines at the -0.33 and +0.33 AI values mark 2-fold differences between hemispheres. Significance in the MANOVA for lateralization effect:  $**p < 0.01$ .
