# Supplementary material
Source: PubMed Central journal article supplement (PMC4259275)
Supplement: supp_bht204_bht204supp_Table.pdf [file supp_bht204_bht204supp_Table.pdf]

### Supplementary Table 1a

Demographic data and tissue characteristics of subjects included in Sample 1

| Subject # | Sex | Age (Years) | Warm time (Hours) | Cold time (Hours) | Total time (Hours) | Brain pH | Cause of death          | Manner of death | RQI**  | pgACC  | dl-PFC | CD     | Pt     |
|-----------|-----|-------------|-------------------|-------------------|--------------------|----------|-------------------------|-----------------|--------|--------|--------|--------|--------|
| 1         | M   | 53          | 8.58              | 43.42             | 52.00              | 6.57     | Intox alc+drugs*        | U               | 7.40   | pgACC  | dl-PFC |        |        |
| 2         | M   | 73          | 5.25              | 29.25             | 34.50              | 6.82     | AMI                     | N               | 7.15   | pgACC  | dl-PFC |        | Pt     |
| 3         | M   | 58          | 3.75              | 47.50             | 51.25              | 6.51     | Cervical spine fracture | A               |        |        | dl-PFC |        |        |
| 4         | M   | 75          | 6.25              | 31.75             | 38.00              | 6.74     | AMI                     | N               | 6.70   | pgACC  | dl-PFC |        |        |
| 5         | M   | 67          | 6.25              | 40.00             | 46.25              | 6.70     | AMI                     | N               | 6.95   | pgACC  | dl-PFC |        |        |
| 6         | M   | 39          | 9.17              | 33.33             | 42.50              | 6.65     | Hanging                 | S               | 7.60   | pgACC  |        |        |        |
| 7         | M   | 23          | 1.75              | 39.92             | 41.67              | 6.96     | Multiple injuries       | S               | 6.70   | pgACC  | dl-PFC |        |        |
| 8         | M   | 62          | 5.75              | 35.92             | 41.67              | 6.74     | Hanging                 | S               | 6.50   | pgACC  | dl-PFC | CD     | Pt     |
| 9         | M   | 23          | 2.80              | 36.17             | 38.97              | 6.83     | Heart failure           | N               | 6.55   | pgACC  | dl-PFC |        | Pt     |
| 10        | M   | 69          | 2.52              | 23.98             | 26.50              | 6.69     | Hanging                 | S               | 7.10   | pgACC  | dl-PFC |        | Pt     |
| 11        | M   | 25          | 10.12             | 25.38             | 35.50              | 6.72     | Hanging                 | S               | 6.40   | pgACC  | dl-PFC |        | Pt     |
| 12        | M   | 58          | 9.67              | 31.33             | 41.00              | 6.67     | AMI                     | N               | 6.10   | pgACC  | dl-PFC | CD     | Pt     |
| 13        | M   | 36          | 5.27              | 35.48             | 40.75              | 6.28     | SAB                     | N               | 6.45   | pgACC  | dl-PFC | CD     | Pt     |
| 14        | M   | 41          | 8.25              | 37.75             | 46.00              | 6.58     | Causa ignota            | N               | 6.75   | pgACC  | dl-PFC | CD     | Pt     |
| 15        | M   | 26          | 11.20             | 25.80             | 37.00              | 6.08     | Intox venlafaxine       | U               | 5.55   | pgACC  | dl-PFC | CD     | Pt     |
| 16        | F   | 59          | 2.63              | 44.67             | 47.30              | 6.27     | Duodenal ulcer          | N               | 6.35   | pgACC  | dl-PFC | CD     | Pt     |
| 17        | F   | 53          | 4.17              | 34.50             | 38.67              | 6.75     | Multiple injuries       | A               | 7.55   | pgACC  | dl-PFC | CD     | Pt     |
| 18        | F   | 58          | 10.92             | 39.08             | 50.00              | 7.00     | SAB                     | N               | 6.75   | pgACC  | dl-PFC | CD     | Pt     |
| 19        | F   | 51          | 7.50              | 31.50             | 39.00              | 6.39     | AMI                     | N               | 6.30   | pgACC  | dl-PFC | CD     | Pt     |
| 20        | F   | 20          | 8.72              | 39.25             | 47.97              | 6.40     | Multiple injuries       | S               | 7.35   | pgACC  | dl-PFC |        | Pt     |
| 21        | F   | 61          | 9.83              | 18.17             | 28.00              | 6.52     | Intox propoxyphene      | U               | 5.85   | pgACC  |        | CD     | Pt     |
| Mean      |     | 49.05       | 6.68              | 34.48             | 41.17              | 6.61     |                         |                 | 6.70   |        |        |        |        |
| ± SD      |     | ± 17.75     | ± 2.60            | ± 7.29            | ± 6.86             | ± 0.23   |                         |                 | ± 0.55 | N = 20 | N = 19 | N = 10 | N = 15 |

M, male; F, female; RQI, RNA quality indicator; intox, Intoxication; alc, Alcohol; AMI, acute myocardial infarction; SAB, subarachnoid hemorrhage; CD, caudate; Pt, putamen; pgACC, pregenual anterior cingulate cortex; dl-PFC, dorsolateral prefrontal cortex; \* several pharmaceutical drugs in high concentration in postmortem femoral blood; \*\* Average value of RQI for left and right hemisphere; A, accidental death; N, natural death; S, suicide; U, undetermined manner of death.

Note: pgACC, caudate and putamen samples were not collected from all subjects due to technical reasons.

**Supplementary Table 1b**

Demographic data and tissue characteristics of subjects included in the sample 2 for pgACC (Replication sample)

| Subject # | Sex | Age (years) | Warm time (Hours) | Cold time (Hours) | Total time (Hours) | Brain pH | Cause of death     | Manner of death | RQI*** |
|-----------|-----|-------------|-------------------|-------------------|--------------------|----------|--------------------|-----------------|--------|
| 1         | M   | 45          | 9.25              | 47.75             | 57.00              | 6.16     | Opiate intox       | A               | 3.25   |
| 2         | M   | 33          | 14.42             | 31.58             | 46.00              | 6.90     | Intox drugs*       | A               | 6.75   |
| 3         | M   | 19          | 24.67             | 33.33             | 58.00              | 6.60     | Suffocation**      | S               | 7.50   |
| 4         | M   | 45          | 5.17              | 46.00             | 51.17              | 6.34     | AMI                | N               | 3.35   |
| 5         | M   | 54          | 3.50              | 59.75             | 63.25              | 5.86     | AMI                | N               | 4.10   |
| 6         | M   | 54          | 5.00              | 56.00             | 61.00              | 6.28     | intox alc.         | A               | -      |
| 7         | M   | 63          | 25.58             | 32.92             | 58.50              | 6.69     | AMI                | N               | 5.95   |
| 8         | M   | 67          | 14.35             | 32.57             | 46.92              | 6.40     | Cardiomyopathy     | N               | 6.00   |
| 9         | M   | 31          | 2.45              | 59.22             | 61.67              | 6.40     | Abdominal injuries | A               | 6.65   |
| 10        | F   | 61          | 5.75              | 39.25             | 45.00              | 6.53     | Hypothermia, SDH   | A               | 4.35   |
| 11        | F   | 44          | 10.58             | 79.42             | 90.00              | 6.78     | Hanging            | S               | 6.55   |
| 12        | F   | 64          | 32.17             | 18.33             | 50.50              | 6.21     | SDH                | A               | 2.80   |
| Mean      |     | 48.33       | 12.74             | 44.67             | 57.41              | 6.42     |                    |                 | 5.20   |
| ± SD      |     | ± 14.98     | ± 9.83            | ± 16.77           | ± 12.09            | ± 0.29   |                    |                 | ± 1.66 |

M, male; F, female; RQI, RNA quality indicator; intox, Intoxication; alc, Alcohol; AMI, acute myocardial infarction; SAB, subarachnoid hemorrhage; SDH, subdural hematoma; \* cocaine and several pharmaceutical drugs in high concentration; \*\*alcohol and several pharmaceutical drugs in high concentration in postmortem femoral blood; A, accidental death; N, natural death; S, suicide; \*\*\*Average RQI value of left and right hemisphere.

**Supplementary Table 2**

Primer sequences used for SYBR green RT-PCR

| Gene symbol  | Forward primer 5'→3'              | Reverse primer 5'→3'              | Reference             | Amplicon size (bp) |
|--------------|-----------------------------------|-----------------------------------|-----------------------|--------------------|
| <i>Oprd1</i> | GCT GGG CAA CGT GCT TGT           | CCA GGT TGA AGA TGT AGA TGT TGG T | Shen et al. 2005      | 83                 |
| <i>Oprk1</i> | CAT CTG TTG GCA TCT CTG CAA       | TGC AAG GAG CAC TCA ATG ACA       | Shen et al. 2005      | 79                 |
| <i>Oprm1</i> | CTT CCT GGT CAT GTA TGT GAT TGT C | GCC AGA GCA AGG TTG AAA ATG       | Gris et al. 2010      | 81                 |
| <i>Penk</i>  | TCC TGG CTT GCG TAA TGG A         | CTC CTT GCA GGT TTC CCA AA        | Tondreau et al. 2008  | 68                 |
| <i>Pdyn</i>  | CAC CAC AGC GGA CTG CCT GT        | AGC AGG GCA GCC TGG CAT TG        | *                     | 111                |
| <i>Pomc</i>  | CTA CGG CGG TTT CAT GAC CT        | CCC TCA CTC GCC CTT CTT G         | Slominski et al. 2005 | 100                |

\* The primers were designed using Vector NTI advance 10.3.1 software (Invitrogen).

### Supplementary Table 3

Covariate analysis of differences between brain areas of partial Spearman correlations of Dyn B with LER. The Dyn B and LER correlations found to be significantly different between the pgACC and dl-PFC, and between putamen and dl-PFC (see Table 2) in the combined male and female sample were adjusted for sex, age, brain pH and total PMI. Differences between correlations were significantly different in the left but not right hemisphere

| Brain areas with different correlation | Spearman's rank coefficient, $\rho$ | Covariate | Corrected $p$ |
|----------------------------------------|-------------------------------------|-----------|---------------|
| pgACC                                  | 0.88***                             | Sex       | < 0.0016      |
| dl-PFC                                 | 0.03                                |           |               |
| Putamen                                | 0.83***                             | Age       | < 0.029       |
| dl-PFC                                 | 0.03                                |           |               |
| pgACC                                  | 0.85***                             | Age       | < 0.010       |
| dl-PFC                                 | 0.10                                |           |               |
| Putamen                                | 0.80***                             | Brain pH  | < 0.095       |
| dl-PFC                                 | 0.10                                |           |               |
| pgACC                                  | 0.87***                             | Brain pH  | < 0.0017      |
| dl-PFC                                 | -0.01                               |           |               |
| Putamen                                | 0.80***                             | Total PMI | < 0.042       |
| dl-PFC                                 | -0.01                               |           |               |
| pgACC                                  | 0.88***                             | Total PMI | < 0.00066     |
| dl-PFC                                 | -0.04                               |           |               |
| Putamen                                | 0.83***                             | Total PMI | < 0.017       |
| dl-PFC                                 | -0.04                               |           |               |

\*\*\* $p < 0.001$ .

**Supplementary Table 4**

Spearman's rank coefficient  $\rho$  for correlations of opioid peptides with tissue characteristics in the pgACC in the combined sample of males and females

| Peptide | Hemisphere | Total PMI | Brain pH | RQI   |
|---------|------------|-----------|----------|-------|
| Dyn A   | Left       | -0.21     | 0.04     | -0.36 |
|         | Right      | 0.20      | 0.11     | 0.06  |
| Dyn B   | Left       | -0.22     | -0.12    | -0.50 |
|         | Right      | 0.05      | 0.41     | 0.15  |
| LER     | Left       | -0.12     | -0.11    | -0.48 |
|         | Right      | 0.15      | -0.33    | -0.04 |
| MEAP    | Left       | 0.08      | -0.61**  | -0.49 |
|         | Right      | -0.04     | -0.17    | -0.19 |

PMI = postmortem interval; RQI = RNA quality indicator. \*\* $p < 0.01$ .

## Supplementary references

- Gris P, Gauthier J, Cheng P, Gibson DG, Gris D, Laur O, Pierson J, Wentworth S, Nackley AG, Maixner W, Diatchenko L. 2010. A novel alternatively spliced isoform of the mu-opioid receptor: functional antagonism. *Mol Pain*. 6:33.
- Shen H, Aeschlimann A, Reisch N, Gay RE, Simmen BR, Michel BA, Gay S, Sprott H. 2005. Kappa and delta opioid receptors are expressed but down-regulated in fibroblast-like synoviocytes of patients with rheumatoid arthritis and osteoarthritis. *Arthritis Rheum*. 52:1402-1410.
- Slominski A, Zbytek B, Szczesniewski A, Semak I, Kaminski J, Sweatman T, Wortsman J. 2005. CRH stimulation of corticosteroids production in melanocytes is mediated by ACTH. *Am J Physiol Endocrinol Metab*. 288:E701-706.
- Tondreau T, Dejeneffe M, Meuleman N, Stamatopoulos B, Delforge A, Martiat P, Bron D, Lagneaux L. 2008. Gene expression pattern of functional neuronal cells derived from human bone marrow mesenchymal stromal cells. *BMC Genomics*. 9:166.
